# Supplementary material for: A bio-attuned ratiometric hydrogen sulfate ion selective receptor in aqueous solvent: structural proof of the H-bonded adduct
Source: Royal Society of Chemistry journal article supplement (doi:10.1039/c4ra10245b), 2014-11-21
Supplement: c4ra10245b1.pdf [file c4ra10245b1.pdf]

# *Supporting Information*

## *for*

### **A bio-attuned ratiometric hydrogen sulfate ion selective receptor in aqueous solvent: structural proof of the H-bonded adduct**

**Manjira Mukherjee,<sup>a</sup> Buddhadeb Sen,<sup>a</sup> Siddhartha Pal,<sup>a</sup> Samya Banerjee,<sup>b</sup> Somenath Lohar,<sup>a</sup> Ennio Zangrando,<sup>c</sup> and Pabitra Chattopadhyay\*,<sup>a</sup>**

*<sup>a</sup>Department of Chemistry, Burdwan University, Golapbag, Burdwan 713104, India;*

*E-mail: [pabitracc@yahoo.com](mailto:pabitracc@yahoo.com)*

*<sup>b</sup>Department of Inorganic and Physical Chemistry, Indian Institute of Science, Bangalore, 560012, India,*

*<sup>c</sup>Dipartimento di Scienze Chimiche e Farmaceutiche, Via Licio Giorgieri 1, 34127 Trieste, Italy*

## **CONTENTS**

**Fig. S1** <sup>1</sup>H NMR spectrum of **1** in DMSO-d<sub>6</sub>

**Fig. S2** Mass spectrum of **1**

**Fig. S3** IR spectrum of **1**

**Fig. S4** <sup>1</sup>H NMR spectrum of **2** in DMSO-d<sub>6</sub>

**Fig. S5** Mass spectrum of **2**

**Fig. S6** IR spectrum of **2**

**Fig. S7** Crystal packing of compound **2** showing the polymeric chain running along the [101] direction realized by O<sub>3</sub>SO...HN hydrogen bonds

**Fig. S8** <sup>1</sup>H NMR titration of **1** with HSO<sub>4</sub><sup>-</sup> anions

**Fig. S9** <sup>1</sup>H NMR spectrum of **1** (**a**) in absence and (**b**) in presence of D<sub>2</sub>O

**Fig. S10** <sup>1</sup>H NMR spectrum of **2** (**a**) in absence and (**b**) in presence of D<sub>2</sub>O

**Fig. S11** Absorption and emission spectra of 25 μM of **1** in 100 mM HEPES buffer (ethanol/water 1:5, v/v) at 25 °C

**Fig. S12** Fluorescence colour of the **1** in absence and presence of HSO<sub>4</sub><sup>-</sup> ion

**Fig. S13** Ratiometric signalling of fluorescence output

**Fig. S14** Fluorescence intensity of **1** in presence of different anions

**Fig. S15** Change of relative fluorescence intensity profile of **1** in presence of different anions

**Fig. S16** Fluorescence response of **1** (25  $\mu\text{M}$ ) in absence and in presence of  $\text{HSO}_4^-$  at different pH in 100 mM HEPES buffer (ethanol/ water: 1/5) at 25  $^\circ\text{C}$ .

**Fig. S17** Job's plot of **1** showing maxima at 1:1

**Fig. S18** Binding constant value  $K = 1.648 \times 10^5 \text{ M}^{-1}$  for **1** determined from the intercept/slope of the plot.

**Fig. S19** Calibration curve for the nanomolar range, with error bars for calculating the LOD of  $\text{HSO}_4^-$  by **1** in 100 mM HEPES buffer (ethanol/ water: 1/5) at 25  $^\circ\text{C}$ .

**Fig. S20** Time-resolved fluorescence decay of **1** (10 mM) in the absence and presence of added  $\text{HSO}_4^-$  ions (10 mM) at  $\lambda_{\text{ex}} = 390 \text{ nm}$  in 100 mM HEPES buffer (ethanol/ water: 1/5, v/v) [ $\lambda_{\text{em}}$ : 485 nm].

**Fig. S21** Optimised structure and energy level diagram for the frontier  $\pi$ -MOs of **1** (left) and **2** (right).

**Fig. S22** Cytotoxic effect of **1** (5, 10, 25, 50 and 100  $\mu\text{M}$ ) in HeLa cells incubated for 18 h

**Table S1** Crystal data and details of refinements for **2**

**Table S2** Selected bond distances ( $\text{\AA}$ ) and bond angles ( $^\circ$ ) for **2**

**Table S3** Life time details of **1**

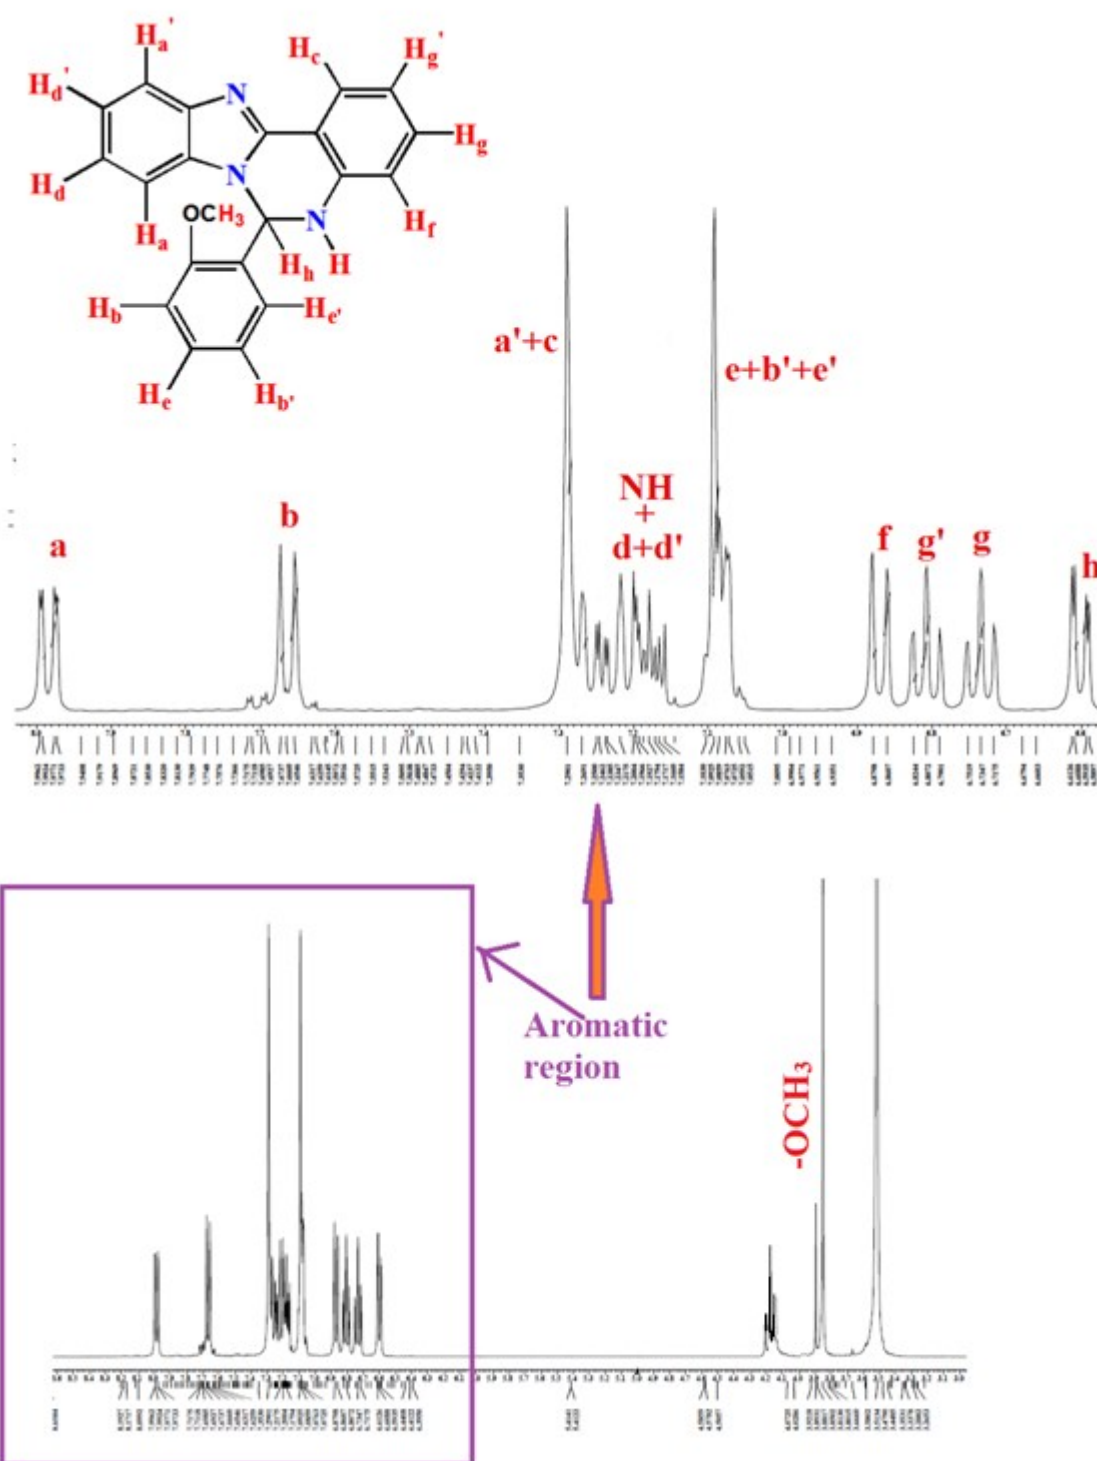

Fig. S1 <sup>1</sup>H NMR of **1** (with expansion) in DMSO-d<sub>6</sub>

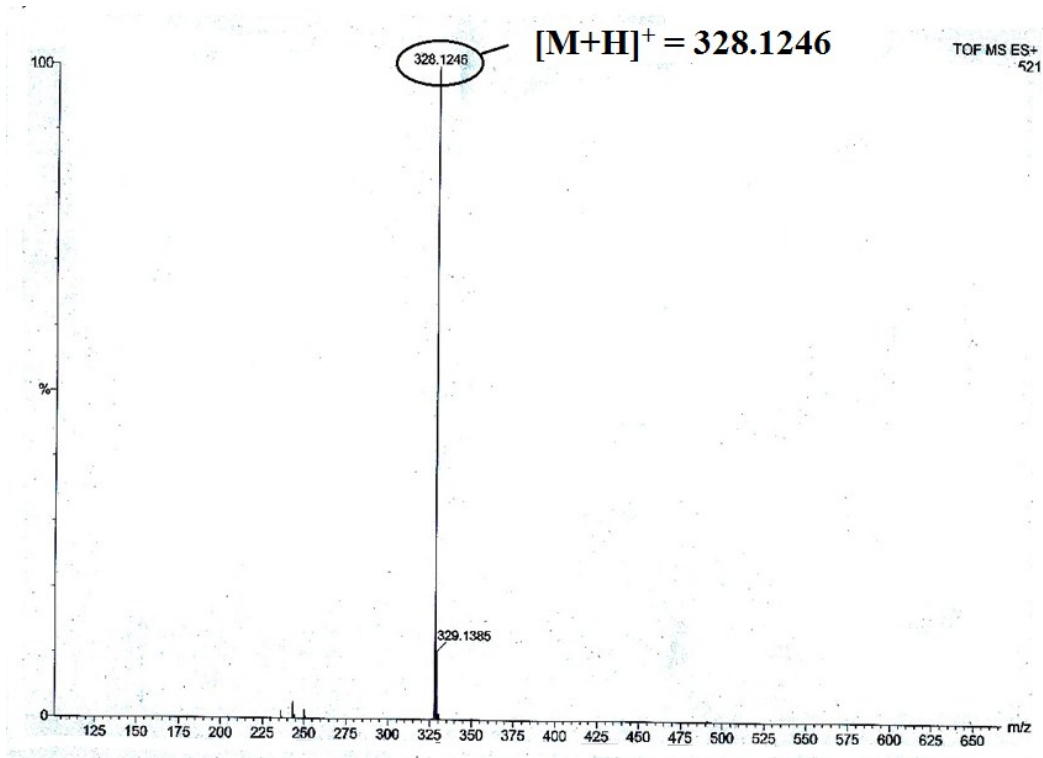

Fig. S2 Mass spectrum of **1**

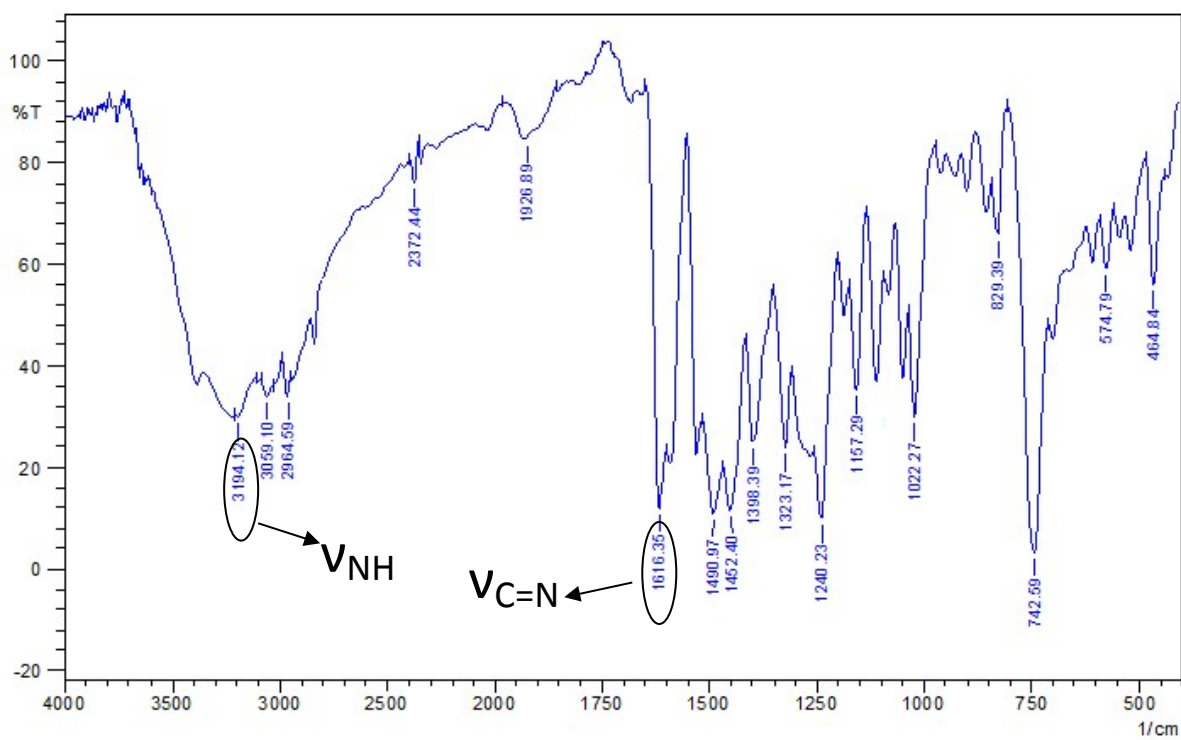

Fig. S3 IR spectrum of **1**



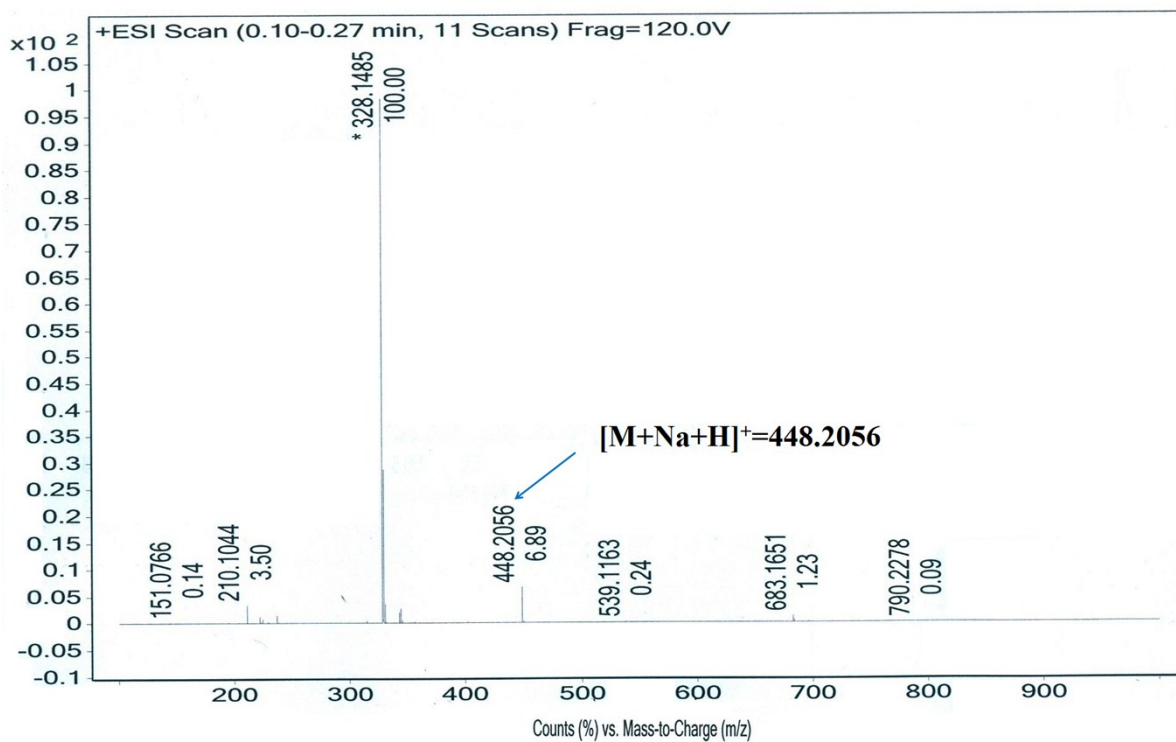

Fig. S5 Mass spectrum of [LHSO<sub>4</sub>]-LH<sup>+</sup>.3H<sub>2</sub>O (2)

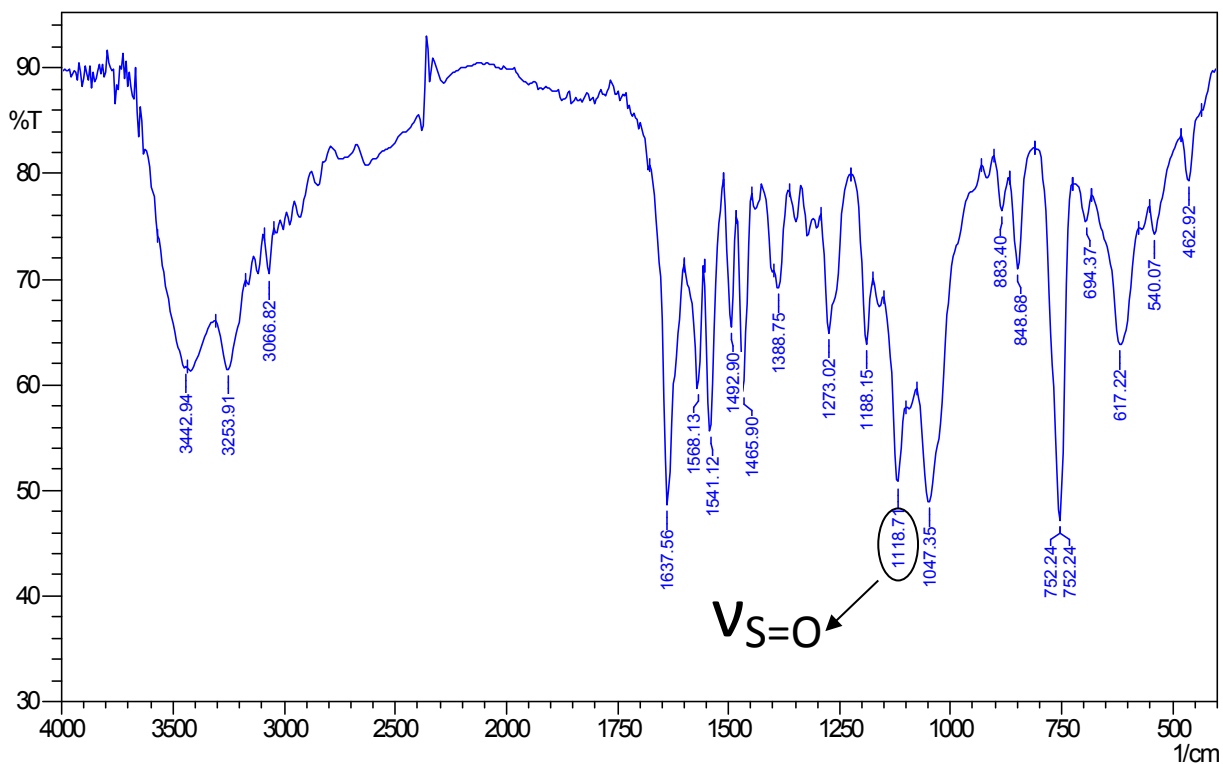

Fig. S6 IR spectrum of 2

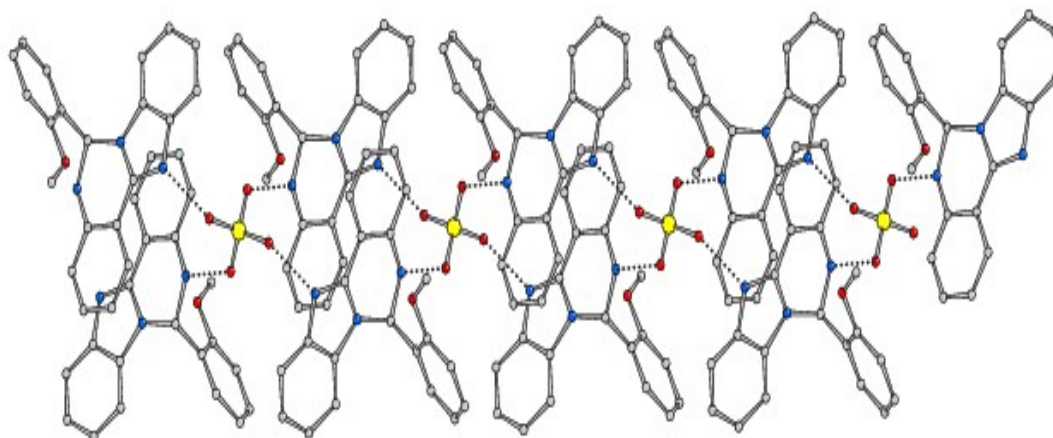

**Fig. S7** Crystal packing of compound **2** showing the polymeric chain running along the [101] direction realized by O<sub>3</sub>SO...HN hydrogen bonds

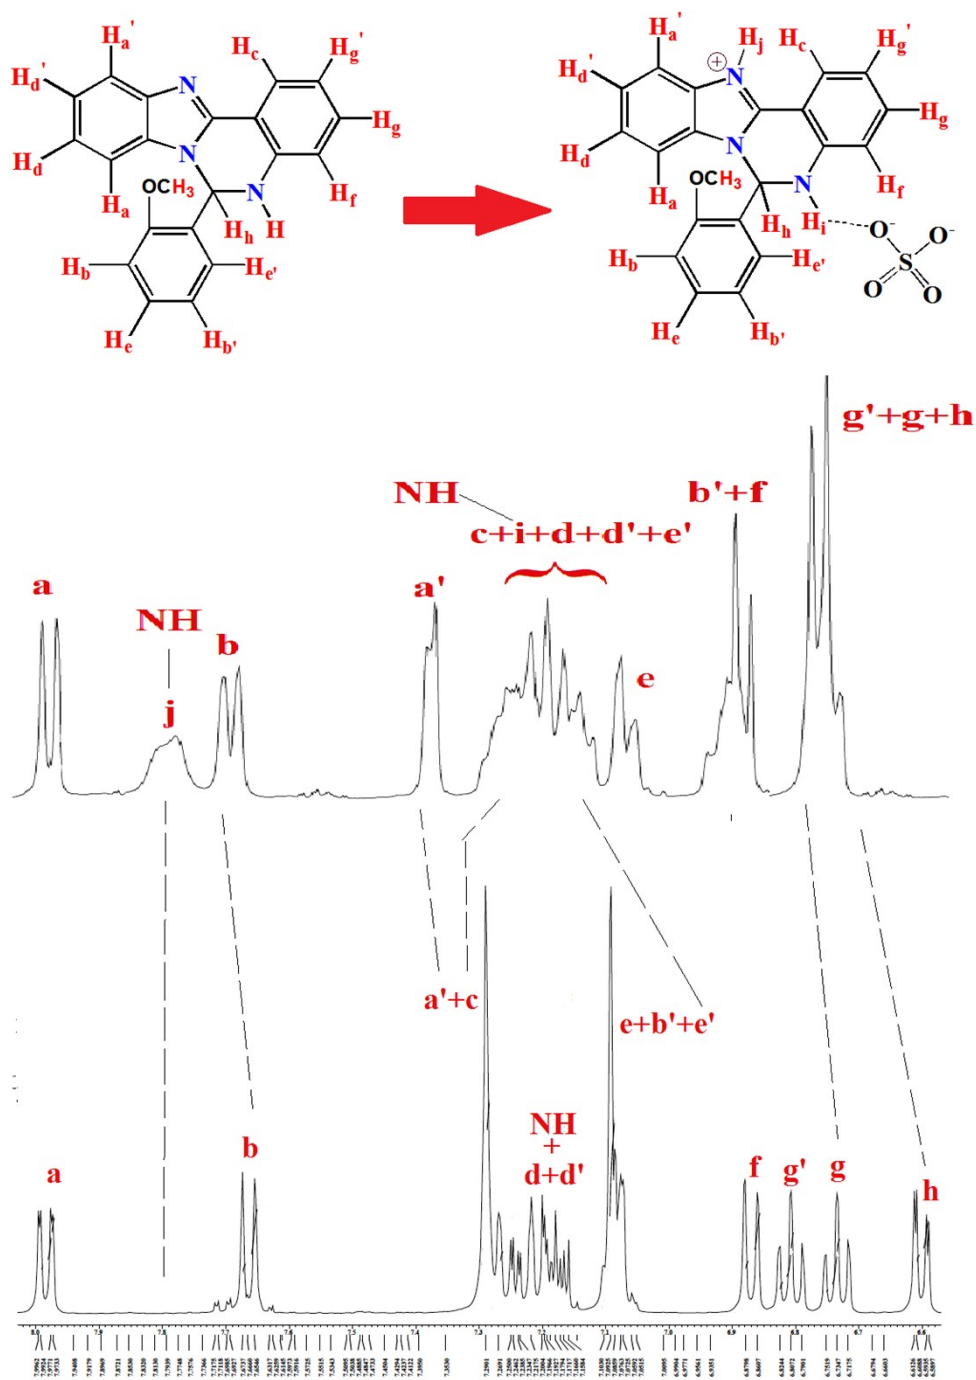

Fig. S8  $^1\text{H}$  NMR spectrum of titration of 1 with  $\text{HSO}_4^-$  in  $\text{DMSO-d}_6$



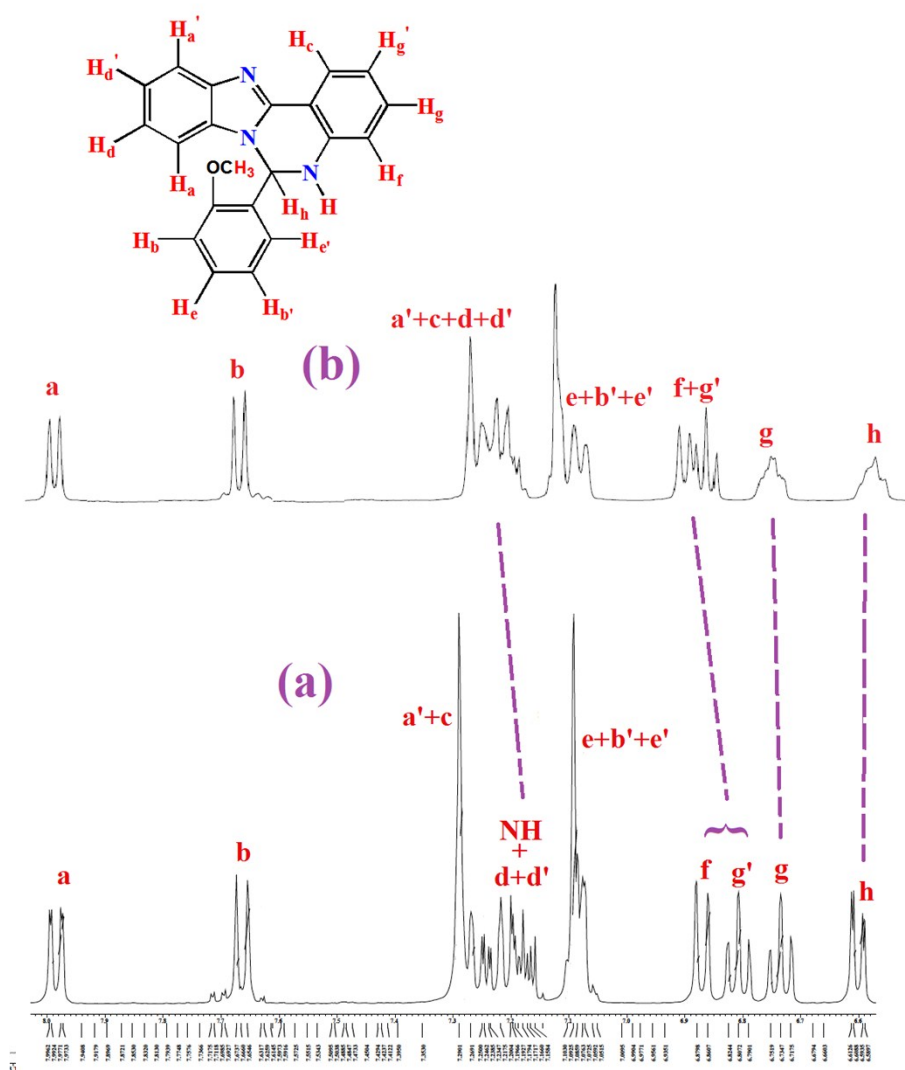

**Fig. S9**  $^1H$  NMR spectrum of **1** (a) in absence and (b) in presence of  $D_2O$

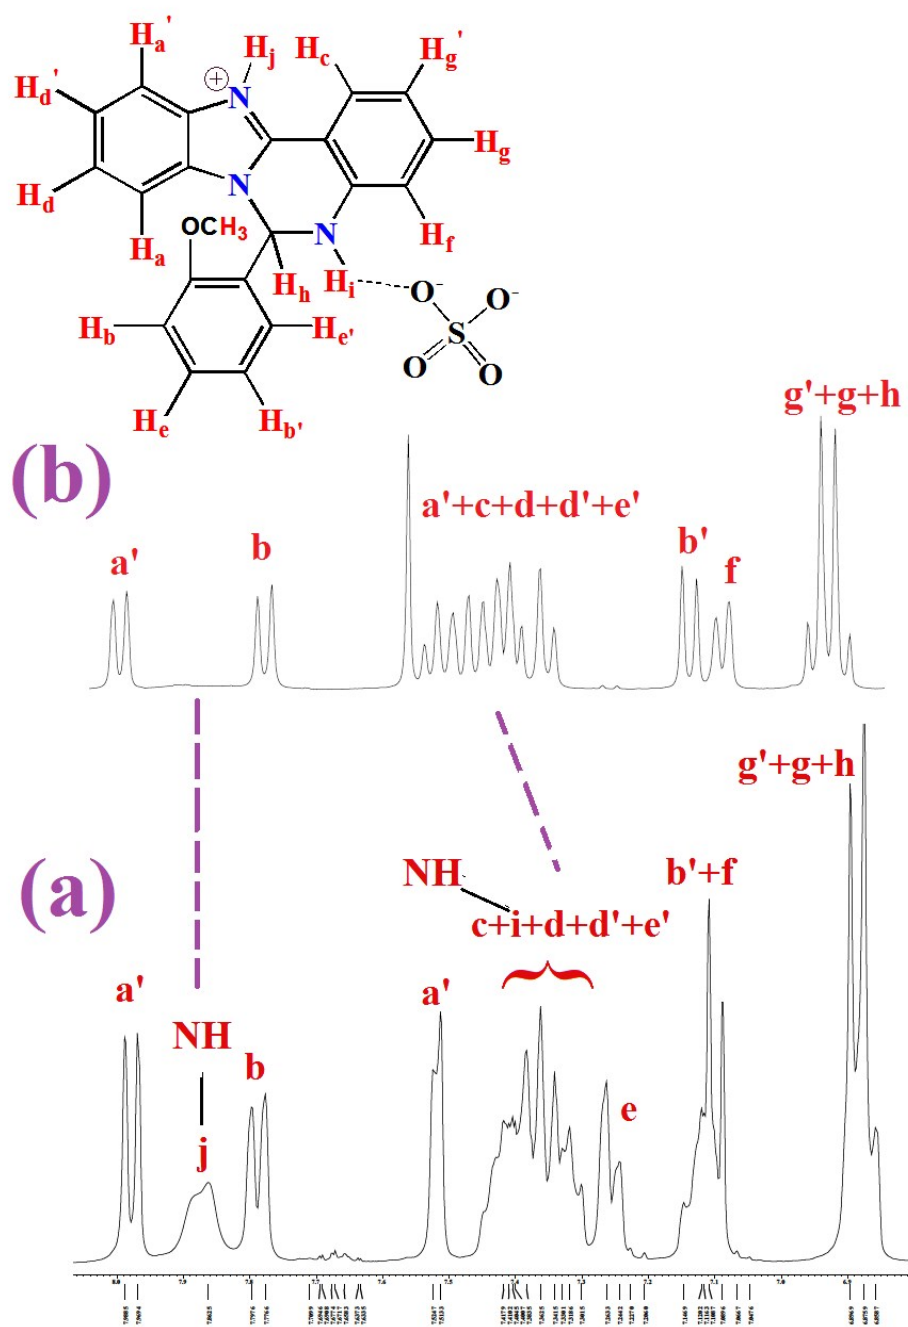

**Fig. S10**  $^1\text{H}$  NMR spectrum of **2** (a) in absence and (b) in presence of  $\text{D}_2\text{O}$

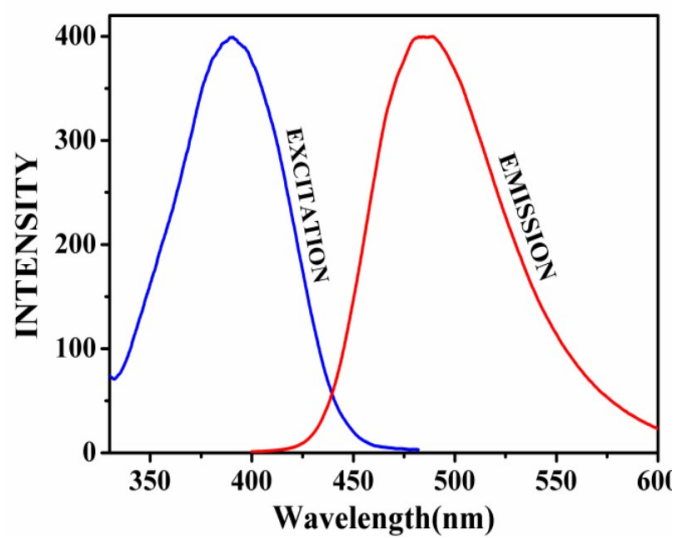

**Fig. S11** Absorption and emission spectra of 25  $\mu\text{M}$  of **1** in 100 mM HEPES buffer (ethanol/water 1:5, v/v) at 25  $^{\circ}\text{C}$

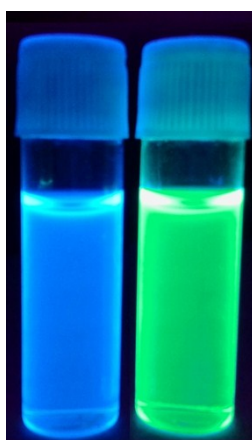

**Fig. S12** Fluorescence colour of **1** in absence (left) and presence (right) of  $\text{HSO}_4^-$  ions.

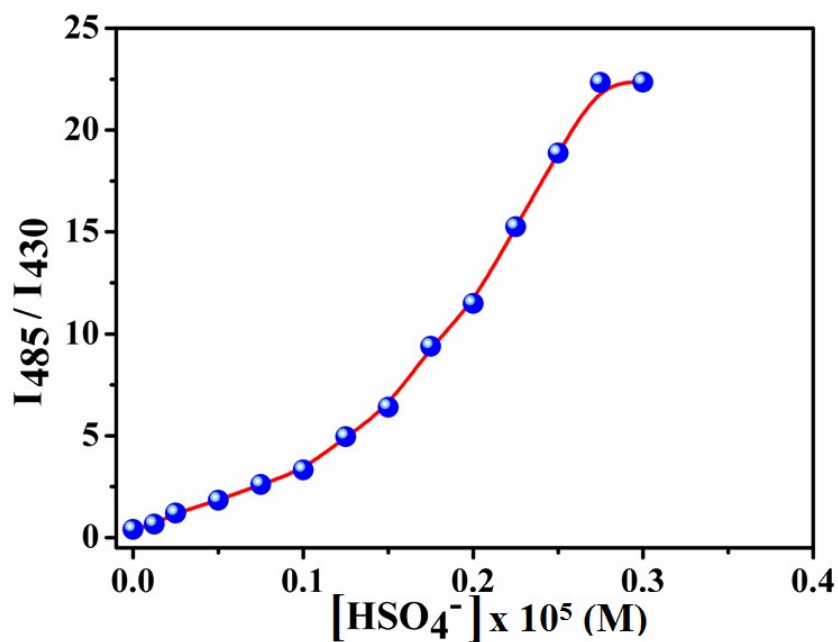

Fig. S13 Ratiometric signaling of fluorescence output of 1

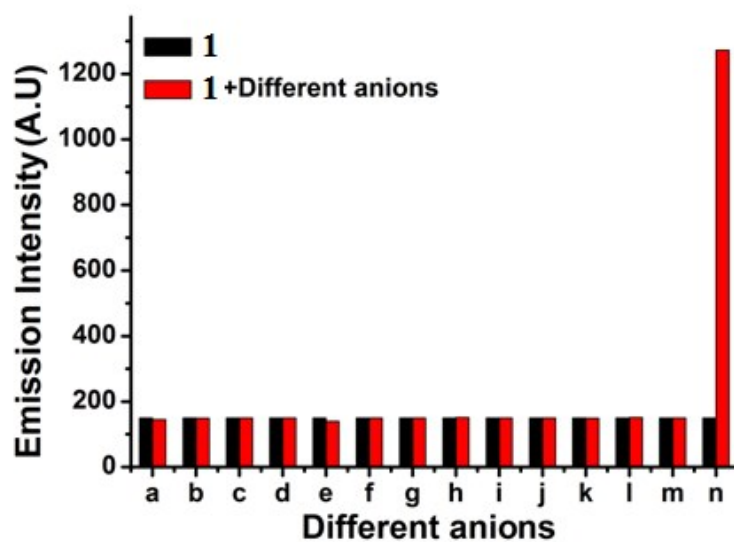

Fig. S14. Fluorescence intensity of 1 in presence of different anions in HEPES buffer (100 mM, pH 7.4; ethanol/water: 1/5, v/v) at 25 °C, (a) Cl<sup>-</sup>, (b) Br<sup>-</sup>, (c) I<sup>-</sup>, (d) F<sup>-</sup>, (e) OAc<sup>-</sup>, (f) H<sub>2</sub>PO<sub>4</sub><sup>-</sup>, (g) N<sub>3</sub><sup>-</sup>, (h) ClO<sub>4</sub><sup>-</sup>, (i) H<sub>2</sub>AsO<sub>4</sub><sup>-</sup>, (j) SO<sub>4</sub><sup>2-</sup>, (k) S<sup>2-</sup>, (l) CN<sup>-</sup>, (m) NO<sub>3</sub><sup>-</sup>, (n) HSO<sub>4</sub><sup>-</sup> ions

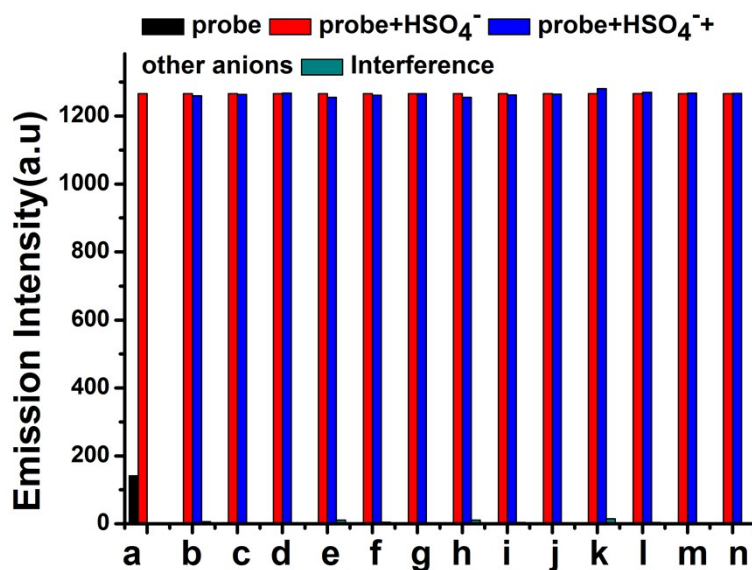

**Fig. S15** Change of relative fluorescence intensity profile of **1** in presence of different anions in ethanol: water (1: 5, v/v) at room temperature ( $\lambda_{\text{ex}}= 390 \text{ nm}$ ) (a)  $\text{HSO}_4^-$ , (b)  $\text{Cl}^-$ , (c)  $\text{Br}^-$ , (d)  $\text{I}^-$ , (e)  $\text{F}^-$ , (f)  $\text{OAc}^-$ , (g)  $\text{H}_2\text{PO}_4^-$ , (h)  $\text{H}_2\text{AsO}_4^-$ , (i)  $\text{ClO}_4^-$ , (j)  $\text{N}_3^-$ , (k)  $\text{SO}_4^{2-}$ , (l)  $\text{S}^{2-}$ , (m)  $\text{CN}^-$ , (n)  $\text{NO}_3^-$  ions.

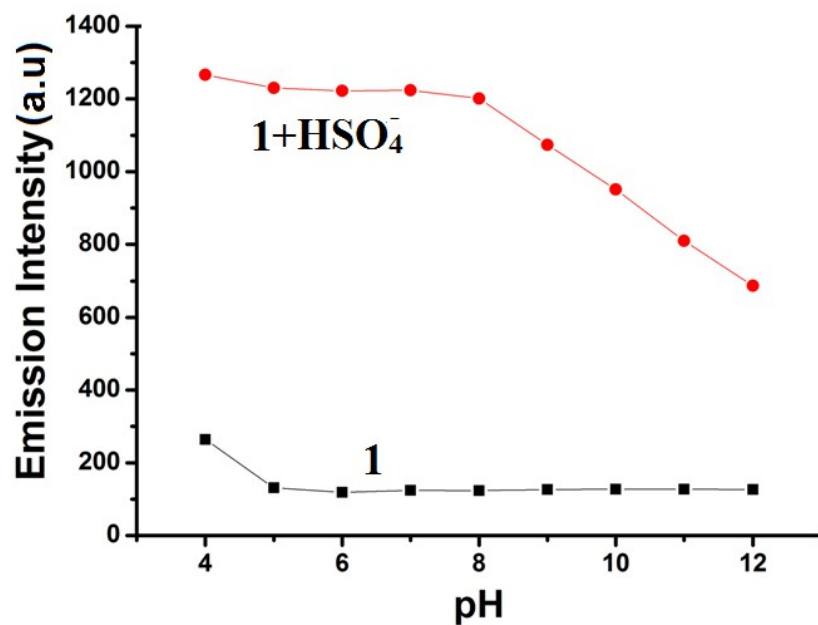

**Fig. S16** Fluorescence response of **1** (25  $\mu\text{M}$ ) in absence and in presence of  $\text{HSO}_4^-$  (one equivalent) at different pH in 100 mM HEPES buffer (ethanol/ water: 1/5) at 25  $^\circ\text{C}$ .

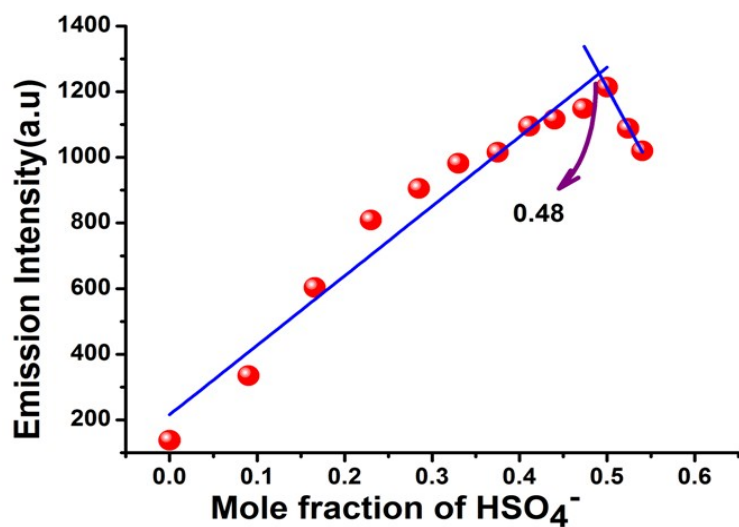

Fig. S17 Job's plot of **1** showing maxima at 1:1

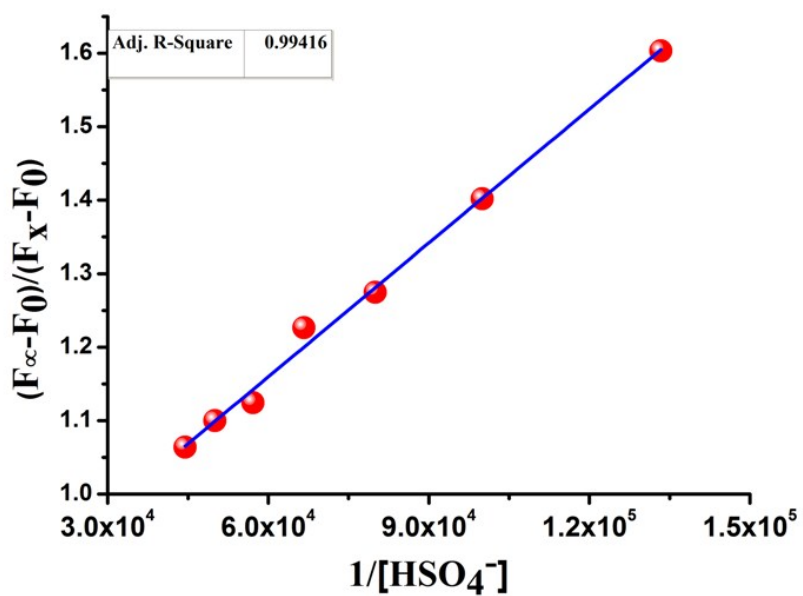

Fig. S18 Binding constant value  $K = 1.648 \times 10^5 \text{ M}^{-1}$  for **1** determined from the intercept/slope of the plot.

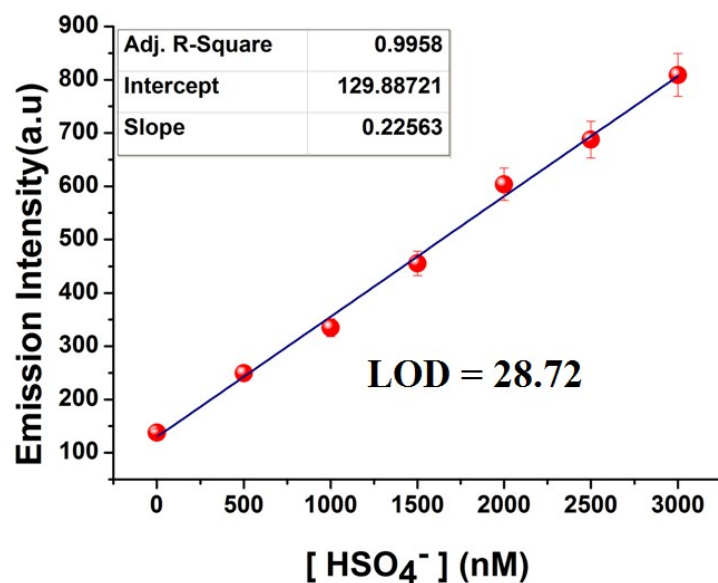

**Fig. S19** Calibration curve for the nanomolar range, with error bars for calculating the LOD of  $\text{HSO}_4^-$  by **1** in 100 mM HEPES buffer (ethanol / water: 1/5) at 25 °C.

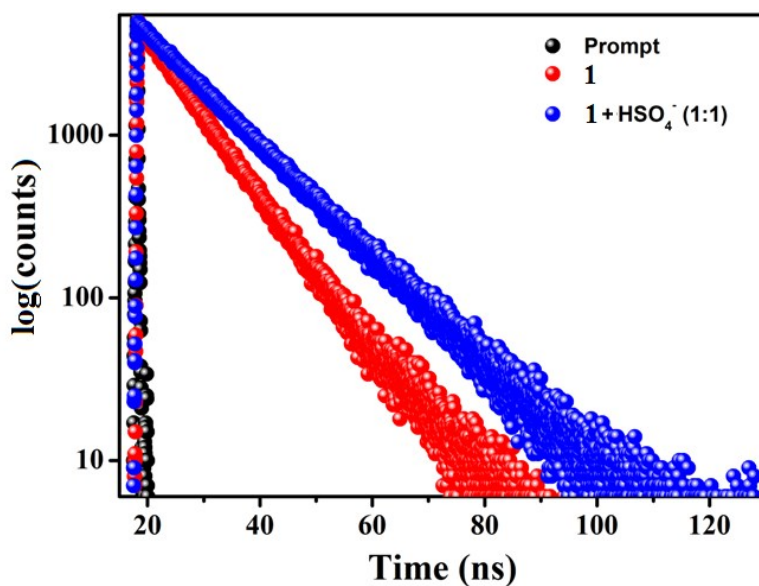

**Fig. S20** Time-resolved fluorescence decay of **1** (10 mM) in the absence and presence of added  $\text{HSO}_4^-$  ions (10 mM) at  $\lambda_{\text{ex}} = 390$  nm in 100 mM HEPES buffer (ethanol/ water: 1/5, v/v) [ $\lambda_{\text{em}}$ : 485 nm].

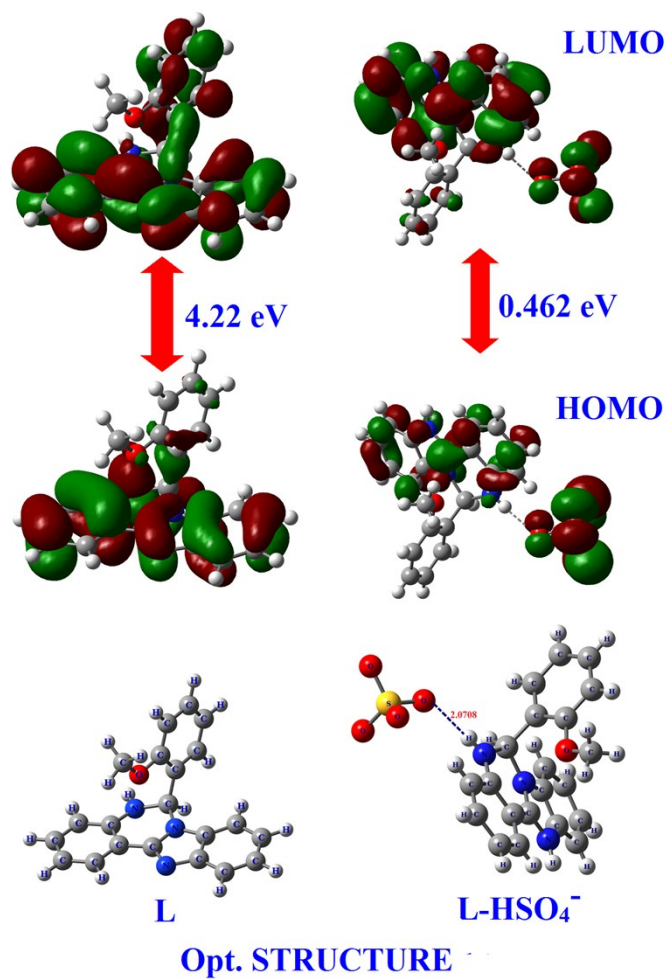

**Fig. S21** Optimised structure and energy level diagram for the frontier  $\pi$ -MOs of **1** (left) and complex **2** (right).

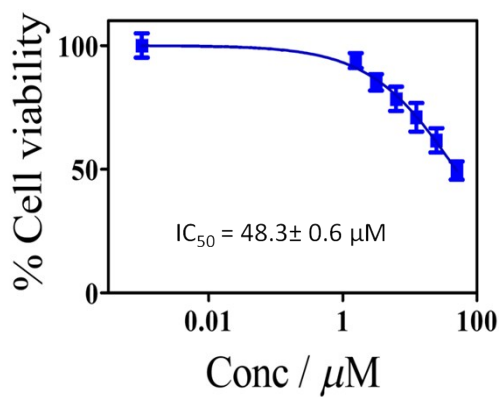

**Fig. S22** Cytotoxic effect of **1** (5, 10, 25, 50 and 100  $\mu\text{M}$ ) in HeLa cells incubated for 18 h

**Table S1** Crystal data and details of refinements for **2**



|                                                               |                                                                                        |
|---------------------------------------------------------------|----------------------------------------------------------------------------------------|
| Empirical Formula                                             | 2(C <sub>21</sub> H <sub>18</sub> N <sub>3</sub> O).SO <sub>4</sub> .3H <sub>2</sub> O |
| Formula Weight                                                | 806.88                                                                                 |
| Crystal system                                                | monoclinic                                                                             |
| Space group                                                   | <i>C</i> 2/c                                                                           |
| <i>a</i> (Å)                                                  | 16.3414(8)                                                                             |
| <i>b</i> (Å)                                                  | 17.0145(9)                                                                             |
| <i>c</i> (Å)                                                  | 16.3578(11)                                                                            |
| $\beta$ (°)                                                   | 118.819(3)                                                                             |
| Volume (Å <sup>3</sup> )                                      | 3984.8(4)                                                                              |
| Temperature (K)                                               | 296(2)                                                                                 |
| $\rho_{\text{calc}}$ (g/cm <sup>3</sup> )                     | 1.345                                                                                  |
| $\mu$ (mm <sup>-1</sup> )                                     | 0.146                                                                                  |
| <i>Z</i>                                                      | 4                                                                                      |
| F(000)                                                        | 1696                                                                                   |
| $\theta$ range (deg)                                          | 3.46- 21.51                                                                            |
| No. of reflns total                                           | 2290                                                                                   |
| No. of reflns [ <i>I</i> > 2 $\sigma$ ( <i>I</i> )]           | 1674                                                                                   |
| Goodness-of-fit on <i>F</i> <sup>2</sup>                      | 1.072                                                                                  |
| <i>R</i> 1, <i>wR</i> 2 ( <i>I</i> > 2 $\sigma$ ( <i>I</i> )) | 0.0558, 0.1513                                                                         |
| <i>R</i> 1, <i>wR</i> 2 (all data)                            | 0.0800, 0.1726                                                                         |

**Table S2** Selected bond distances (Å) and bond angles (°) for **2**

| <b>Bond length (Å)</b> |          |
|------------------------|----------|
| N1 C15                 | 1.333(5) |
| N1 C16                 | 1.397(5) |
| N2 C15                 | 1.347(5) |
| N2 C21                 | 1.402(5) |
| N2 C8                  | 1.465(5) |
| N3 C9                  | 1.363(5) |
| N3 C8                  | 1.443(5) |
| O1 C2                  | 1.365(5) |
| O1 C1                  | 1.414(5) |
| <b>Bond angles (°)</b> |          |
| C15 N1 C16             | 109.2(3) |
| C15 N2 C21             | 108.4(3) |
| C15 N2 C8              | 124.8(3) |
| C21 N2 C8              | 126.5(3) |
| C9 N3 C8               | 125.4(3) |
| C2 O1 C1               | 119.1(3) |
| N3 C8 N2               | 107.9(3) |
| N3 C8 C7               | 115.4(3) |
| O1 C2 C7               | 115.6(3) |
| N3 C9 C10              | 120.8(4) |
| N3 C9 C14              | 120.8(4) |
| C10 C9 C14             | 118.3(4) |
| N1 C15 N2              | 109.0(4) |
| N1 C15 C14             | 129.3(4) |
| N2 C15 C14             | 121.7(4) |

**Table S3.** Life time details of **1**

|                                                | <b>B<sub>1</sub></b> | <b>B<sub>2</sub></b> | <b>τ<sub>1</sub> (ns)</b> | <b>τ<sub>2</sub> (ns)</b> | <b>τ<sub>av</sub> (ns)</b> | <b>χ<sup>2</sup></b> | <b>Φ</b> | <b>K<sub>r</sub></b> | <b>K<sub>nr</sub></b> |
|------------------------------------------------|----------------------|----------------------|---------------------------|---------------------------|----------------------------|----------------------|----------|----------------------|-----------------------|
| <b>1</b>                                       | 56.17                | 43.83                | 7.71                      | 10.74                     | 9.038                      | 1.068                | 0.07     | 0.0077               | 0.1028                |
| <b>1+HSO<sub>4</sub><sup>-</sup><br/>(1:1)</b> | 5.71                 | 94.29                | 7.5                       | 13.08                     | 12.76                      | 1.078                | 0.5      | 0.039                | 0.039                 |
